# Supplementary material for: A robust and stretchable superhydrophobic PDMS/PVDF@KNFs membrane for oil/water separation and flame retardancy
Source: Royal Society of Chemistry journal article supplement (doi:10.1039/c8nr01274a), 2018-01-01
Supplement: c8nr01274a7.pdf [file c8nr01274a7.pdf]

## Supporting Information

### A Robust and stretchable Superhydrophobic PDMS/PVDF@KNFs membrane with Oil/Water Separation and Flame Retardancy

Deke Li,<sup>ac</sup> Xuelian Gou,<sup>ab</sup> Daheng Wu,<sup>ab</sup> and Zhiguang Guo<sup>\*ab</sup>

<sup>a</sup> State Key Laboratory of Solid Lubrication, Lanzhou Institute of Chemical Physics, Chinese Academy of Sciences, Lanzhou 730000, People's Republic of China

<sup>b</sup> Hubei Collaborative Innovation Centre for Advanced Organic Chemical Materials and Ministry of Education Key Laboratory for the Green Preparation and Application of Functional Materials, Hubei University, Wuhan 430062, People's Republic of China

<sup>c</sup> University of Chinese Academy of Sciences, Beijing 100049, People's Republic of China

Correspondence to: Z. Guo (E - mail: [zguo@licp.cas.cn](mailto:zguo@licp.cas.cn))

**This ESI contains:**

Supplementary Figures

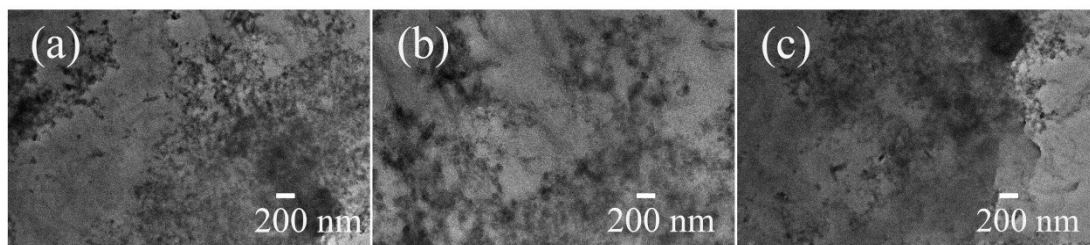

**Fig. S1†.** TEM images of Kevlar fibers (a), KNFs (b) and KNFs 2h (c).

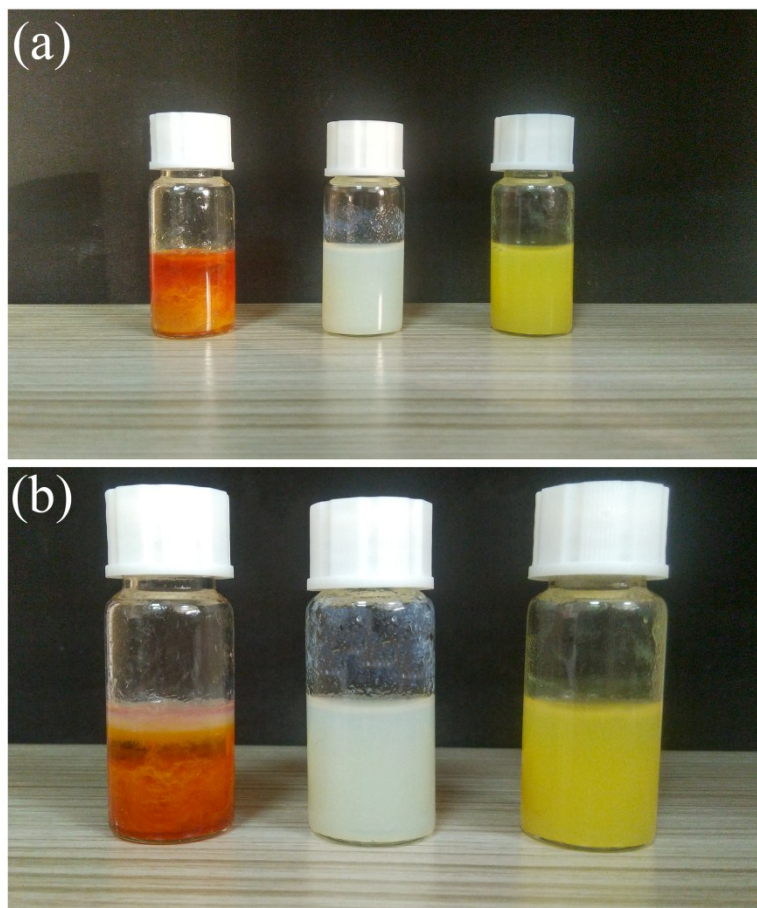

**Fig. S2†.** Dispersibility of Kevlar fibers (brown), Kevlar nanofibrils (white) and KNFs (yellow) before (a) and after 7days (b).

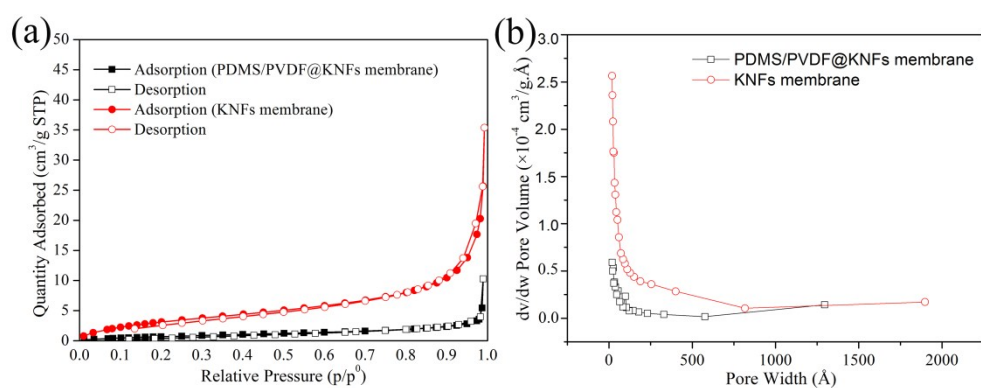

**Fig. S3†.** (a) N<sub>2</sub> sorption isotherm curve of PDMS/PVDF@KNFs membranes, (b) Barrett-Joyner-Halenda (BJH)-desorption dV/dw Pore Volume of the PDMS/PVDF@KNFs membranes, which performed on an ASAP 2020 surface analyzer (Micromeritics, USA) at 77.23 K.

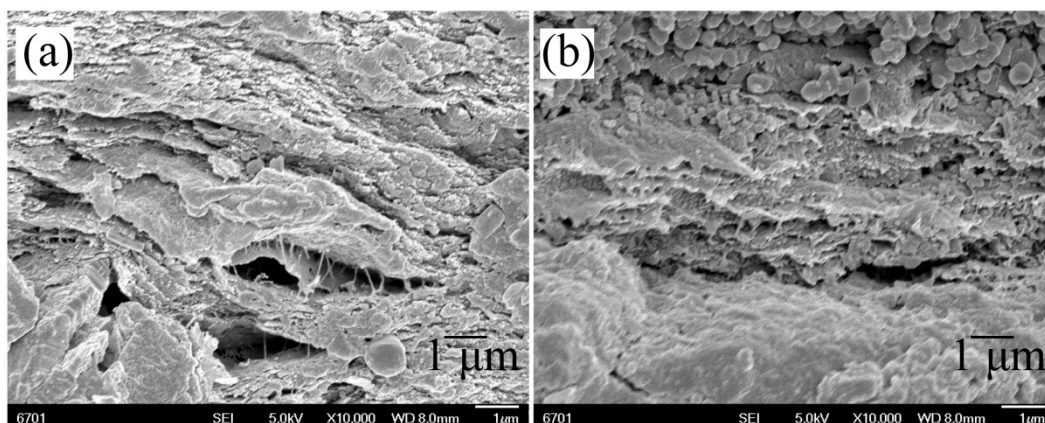

**Fig. S4†.** SEM images of cracked surfaces of KNFs (a) and PDMS/PVDF@KNFs membranes (b) after tensile testing.

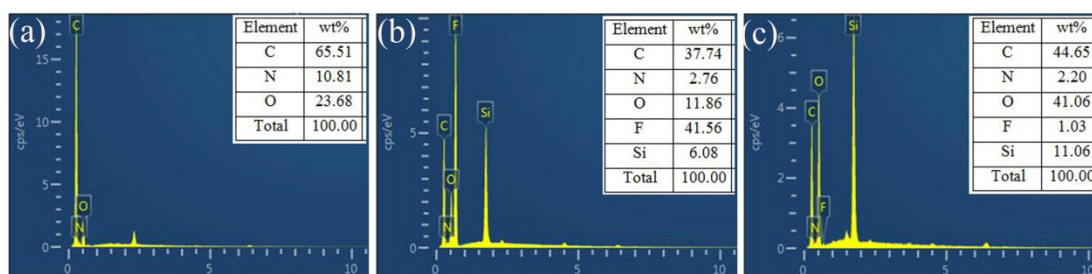

**Fig. S5†.** The energy dispersive X-ray (EDX) spectra of KNFs membrane (a), PDMS/PVDF@KNFs membrane before (b) and after burning (c).

#### Supplementary Movies

**Movie S1†.** Oils absorb of the PDMS/PVDF@KNFs membrane from oil water mixture (n-hexane and water).

**Movie S2†.** Oils absorb of the PDMS/PVDF@KNFs membrane from oil water mixture (dichloroethane and water).

**Movie S3†.** The oil-water separation of the PDMS/PVDF@KNFs membrane.

**Movie S4†.** The deformation processes of PDMS/PVDF@KNFs membrane by man-made bending destructions.

**Movie S5†.** The stress-strain processes of PDMS/PVDF@KNFs membrane by tensile test.

**Movie S6†.** Combustion behaviors of KNFs membrane.

**Movie S7†.** Flame resistance of PDMS/PVDF@KNFs membrane.
